# Supplementary material for: Gaseous Elemental Mercury and Total and Leached Mercury in Building Materials from the Former Hg-Mining Area of Abbadia San Salvatore (Central Italy)
Source: Int J Environ Res Public Health. 2017 Apr 15;14(4):425. doi: 10.3390/ijerph14040425 (PMC5409626; doi:10.3390/ijerph14040425)
Supplement: Supplementary file 1 [file ijerph-14-00425-s001.xlsx]

## Sheet: Foglio1
Unit	Edifice	Floor	Track	Date	Hg (ng m-3)	Mean T °C	Min. T °C	Max T °C
2	1	Basement	A	2011-07-19	n.d.	20.2	15.6	28.9
2	1	Basement	A	2011-08-20	83	25.2	14.9	27.8
2	1	Basement	A	2011-09-01	119	15	9.2	21.7
2	1	Basement	A	2012-07-20	148	25.4	16.6	28.3
2	1	Basement	A	2013-01-29	20	2	-2.1	9.8
2	1	Basement	A	2014-01-08	24	4.5	0.4	7.2
2	1	Basement	A	2014-06-06	79	16.5	9.7	22.3
2	1	Basement	A	2015-01-15	61	3.2	-0.3	8.6
2	1	Basement	A	2015-08-20	59	16.2	10.7	20.6
2	1	Basement	B	2011-07-19	61	20.2	15.6	28.9
2	1	Basement	B	2011-08-20	76	25.2	14.9	27.8
2	1	Basement	B	2011-09-01	102	15	9.2	21.7
2	1	Basement	B	2012-07-20	168	25.4	16.6	28.3
2	1	Basement	B	2013-01-29	20	2	-2.1	9.8
2	1	Basement	B	2014-01-08	24	4.5	0.4	7.2
2	1	Basement	B	2014-06-06	78	16.5	9.7	22.3
2	1	Basement	B	2015-01-15	61	3.2	-0.3	8.6
2	1	Basement	B	2015-08-20	54	16.2	10.7	20.6
2	1	Basement	C	2011-07-19	61	20.2	15.6	28.9
2	1	Basement	C	2011-08-20	72	25.2	14.9	27.8
2	1	Basement	C	2011-09-01	90	15	9.2	21.7
2	1	Basement	C	2012-07-20	182	25.4	16.6	28.3
2	1	Basement	C	2013-01-29	45	2	-2.1	9.8
2	1	Basement	C	2014-01-08	26	4.5	0.4	7.2
2	1	Basement	C	2014-06-06	93	16.5	9.7	22.3
2	1	Basement	C	2015-01-15	61	3.2	-0.3	8.6
2	1	Basement	C	2015-08-20	96	16.2	10.7	20.6
2	1	Basement	D	2011-07-19	64	20.2	15.6	28.9
2	1	Basement	D	2011-08-20	72	25.2	14.9	27.8
2	1	Basement	D	2011-09-01	97	15	9.2	21.7
2	1	Basement	D	2012-07-20	162	25.4	16.6	28.3
2	1	Basement	D	2013-01-29	45	2	-2.1	9.8
2	1	Basement	D	2014-01-08	37	4.5	0.4	7.2
2	1	Basement	D	2014-06-06	97	16.5	9.7	22.3
2	1	Basement	D	2015-01-15	64	3.2	-0.3	8.6
2	1	Basement	D	2015-08-20	75	16.2	10.7	20.6
2	1	Basement	E	2011-07-19	60	20.2	15.6	28.9
2	1	Basement	E	2011-08-20	70	25.2	14.9	27.8
2	1	Basement	E	2011-09-01	94	15	9.2	21.7
2	1	Basement	E	2012-07-20	131	25.4	16.6	28.3
2	1	Basement	E	2013-01-29	20	2	-2.1	9.8
2	1	Basement	E	2014-01-08	25	4.5	0.4	7.2
2	1	Basement	E	2014-06-06	64	16.5	9.7	22.3
2	1	Basement	E	2015-01-15	60	3.2	-0.3	8.6
2	1	Basement	E	2015-08-20	49	16.2	10.7	20.6
2	1	Ground floor	A	2011-07-19	163	20.2	15.6	28.9
2	1	Ground floor	A	2011-08-20	151	25.2	14.9	27.8
2	1	Ground floor	A	2011-09-01	606	15	9.2	21.7
2	1	Ground floor	A	2012-07-20	331	25.4	16.6	28.3
2	1	Ground floor	A	2013-01-29	12	2	-2.1	9.8
2	1	Ground floor	A	2014-01-08	52	4.5	0.4	7.2
2	1	Ground floor	A	2014-06-06	238	16.5	9.7	22.3
2	1	Ground floor	A	2015-01-15	165	3.2	-0.3	8.6
2	1	Ground floor	A	2015-08-20	156	16.2	10.7	20.6
2	1	Ground floor	B	2011-07-19	137	20.2	15.6	28.9
2	1	Ground floor	B	2011-08-20	143	25.2	14.9	27.8
2	1	Ground floor	B	2011-09-01	463	15	9.2	21.7
2	1	Ground floor	B	2012-07-20	270	25.4	16.6	28.3
2	1	Ground floor	B	2013-01-29	5	2	-2.1	9.8
2	1	Ground floor	B	2014-01-08	41	4.5	0.4	7.2
2	1	Ground floor	B	2014-06-06	138	16.5	9.7	22.3
2	1	Ground floor	B	2015-01-15	137	3.2	-0.3	8.6
2	1	Ground floor	B	2015-08-20	119	16.2	10.7	20.6
2	1	Ground floor	C	2011-07-19	105	20.2	15.6	28.9
2	1	Ground floor	C	2011-08-20	100	25.2	14.9	27.8
2	1	Ground floor	C	2011-09-01	n.d.	15	9.2	21.7
2	1	Ground floor	C	2012-07-20	96	25.4	16.6	28.3
2	1	Ground floor	C	2013-01-29	5	2	-2.1	9.8
2	1	Ground floor	C	2014-01-08	16	4.5	0.4	7.2
2	1	Ground floor	C	2014-06-06	88	16.5	9.7	22.3
2	1	Ground floor	C	2015-01-15	105	3.2	-0.3	8.6
2	1	Ground floor	C	2015-08-20	106	16.2	10.7	20.6
2	1	Ground floor	D	2011-07-19	119	20.2	15.6	28.9
2	1	Ground floor	D	2011-08-20	113	25.2	14.9	27.8
2	1	Ground floor	D	2011-09-01	110	15	9.2	21.7
2	1	Ground floor	D	2012-07-20	178	25.4	16.6	28.3
2	1	Ground floor	D	2013-01-29	5	2	-2.1	9.8
2	1	Ground floor	D	2014-01-08	19	4.5	0.4	7.2
2	1	Ground floor	D	2014-06-06	91	16.5	9.7	22.3
2	1	Ground floor	D	2015-01-15	119	3.2	-0.3	8.6
2	1	Ground floor	D	2015-08-20	92	16.2	10.7	20.6
2	1	Ground floor	E	2011-07-19	139	20.2	15.6	28.9
2	1	Ground floor	E	2011-08-20	162	25.2	14.9	27.8
2	1	Ground floor	E	2011-09-01	287	15	9.2	21.7
2	1	Ground floor	E	2012-07-20	200	25.4	16.6	28.3
2	1	Ground floor	E	2013-01-29	n.d.	2	-2.1	9.8
2	1	Ground floor	E	2014-01-08	35	4.5	0.4	7.2
2	1	Ground floor	E	2014-06-06	149	16.5	9.7	22.3
2	1	Ground floor	E	2015-01-15	n.d.	3.2	-0.3	8.6
2	1	Ground floor	E	2015-08-20	139	16.2	10.7	20.6
2	1	Ground floor	F	2011-07-19	71	20.2	15.6	28.9
2	1	Ground floor	F	2011-08-20	125	25.2	14.9	27.8
2	1	Ground floor	F	2011-09-01	149	15	9.2	21.7
2	1	Ground floor	F	2012-07-20	138	25.4	16.6	28.3
2	1	Ground floor	F	2013-01-29	n.d.	2	-2.1	9.8
2	1	Ground floor	F	2014-01-08	50	4.5	0.4	7.2
2	1	Ground floor	F	2014-06-06	115	16.5	9.7	22.3
2	1	Ground floor	F	2015-01-15	71	3.2	-0.3	8.6
2	1	Ground floor	F	2015-08-20	81	16.2	10.7	20.6
2	1	Ground floor	G	2011-07-19	102	20.2	15.6	28.9
2	1	Ground floor	G	2011-08-20	91	25.2	14.9	27.8
2	1	Ground floor	G	2011-09-01	101	15	9.2	21.7
2	1	Ground floor	G	2012-07-20	118	25.4	16.6	28.3
2	1	Ground floor	G	2013-01-29	5	2	-2.1	9.8
2	1	Ground floor	G	2014-01-08	23	4.5	0.4	7.2
2	1	Ground floor	G	2014-06-06	76	16.5	9.7	22.3
2	1	Ground floor	G	2015-01-15	102	3.2	-0.3	8.6
2	1	Ground floor	G	2015-08-20	94	16.2	10.7	20.6
2	1	Ground floor	H	2011-07-19	83	20.2	15.6	28.9
2	1	Ground floor	H	2011-08-20	68	25.2	14.9	27.8
2	1	Ground floor	H	2011-09-01	125	15	9.2	21.7
2	1	Ground floor	H	2012-07-20	181	25.4	16.6	28.3
2	1	Ground floor	H	2013-01-29	5	2	-2.1	9.8
2	1	Ground floor	H	2014-01-08	23	4.5	0.4	7.2
2	1	Ground floor	H	2014-06-06	35	16.5	9.7	22.3
2	1	Ground floor	H	2015-01-15	83	3.2	-0.3	8.6
2	1	Ground floor	H	2015-08-20	81	16.2	10.7	20.6
2	1	Ground floor	I	2011-07-19	92	20.2	15.6	28.9
2	1	Ground floor	I	2011-08-20	149	25.2	14.9	27.8
2	1	Ground floor	I	2011-09-01	97	15	9.2	21.7
2	1	Ground floor	I	2012-07-20	112	25.4	16.6	28.3
2	1	Ground floor	I	2013-01-29	23	2	-2.1	9.8
2	1	Ground floor	I	2014-01-08	38	4.5	0.4	7.2
2	1	Ground floor	I	2014-06-06	35	16.5	9.7	22.3
2	1	Ground floor	I	2015-01-15	92	3.2	-0.3	8.6
2	1	Ground floor	I	2015-08-20	57	16.2	10.7	20.6
2	1	Ground floor	J	2011-07-19	95	20.2	15.6	28.9
2	1	Ground floor	J	2011-08-20	65	25.2	14.9	27.8
2	1	Ground floor	J	2011-09-01	58	15	9.2	21.7
2	1	Ground floor	J	2012-07-20	114	25.4	16.6	28.3
2	1	Ground floor	J	2013-01-29	5	2	-2.1	9.8
2	1	Ground floor	J	2014-01-08	25	4.5	0.4	7.2
2	1	Ground floor	J	2014-06-06	96	16.5	9.7	22.3
2	1	Ground floor	J	2015-01-15	95	3.2	-0.3	8.6
2	1	Ground floor	J	2015-08-20	82	16.2	10.7	20.6
2	1	Ground floor	K	2011-07-19	122	20.2	15.6	28.9
2	1	Ground floor	K	2011-08-20	91	25.2	14.9	27.8
2	1	Ground floor	K	2011-09-01	74	15	9.2	21.7
2	1	Ground floor	K	2012-07-20	134	25.4	16.6	28.3
2	1	Ground floor	K	2013-01-29	5	2	-2.1	9.8
2	1	Ground floor	K	2014-01-08	31	4.5	0.4	7.2
2	1	Ground floor	K	2014-06-06	96	16.5	9.7	22.3
2	1	Ground floor	K	2015-01-15	122	3.2	-0.3	8.6
2	1	Ground floor	K	2015-08-20	139	16.2	10.7	20.6
2	1	Ground floor	L	2011-07-19	72	20.2	15.6	28.9
2	1	Ground floor	L	2011-08-20	111	25.2	14.9	27.8
2	1	Ground floor	L	2011-09-01	84	15	9.2	21.7
2	1	Ground floor	L	2012-07-20	133	25.4	16.6	28.3
2	1	Ground floor	L	2013-01-29	5	2	-2.1	9.8
2	1	Ground floor	L	2014-01-08	34	4.5	0.4	7.2
2	1	Ground floor	L	2014-06-06	64	16.5	9.7	22.3
2	1	Ground floor	L	2015-01-15	72	3.2	-0.3	8.6
2	1	Ground floor	L	2015-08-20	74	16.2	10.7	20.6
2	1	Ground floor	M	2011-07-19	88	20.2	15.6	28.9
2	1	Ground floor	M	2011-08-20	232	25.2	14.9	27.8
2	1	Ground floor	M	2011-09-01	n.d.	15	9.2	21.7
2	1	Ground floor	M	2012-07-20	163	25.4	16.6	28.3
2	1	Ground floor	M	2013-01-29	8	2	-2.1	9.8
2	1	Ground floor	M	2014-01-08	47	4.5	0.4	7.2
2	1	Ground floor	M	2014-06-06	88	16.5	9.7	22.3
2	1	Ground floor	M	2015-01-15	88	3.2	-0.3	8.6
2	1	Ground floor	M	2015-08-20	159	16.2	10.7	20.6
2	1	Ground floor	N	2011-07-19	45	20.2	15.6	28.9
2	1	Ground floor	N	2011-08-20	238	25.2	14.9	27.8
2	1	Ground floor	N	2011-09-01	50	15	9.2	21.7
2	1	Ground floor	N	2012-07-20	73	25.4	16.6	28.3
2	1	Ground floor	N	2013-01-29	161	2	-2.1	9.8
2	1	Ground floor	N	2014-01-08	502	4.5	0.4	7.2
2	1	Ground floor	N	2014-06-06	570	16.5	9.7	22.3
2	1	Ground floor	N	2015-01-15	450	3.2	-0.3	8.6
2	1	Ground floor	N	2015-08-20	699	16.2	10.7	20.6
2	1	Ground floor	O	2011-07-19	n.d.	20.2	15.6	28.9
2	1	Ground floor	O	2011-08-20	n.d.	25.2	14.9	27.8
2	1	Ground floor	O	2011-09-01	n.d.	15	9.2	21.7
2	1	Ground floor	O	2012-07-20	37	25.4	16.6	28.3
2	1	Ground floor	O	2013-01-29	8	2	-2.1	9.8
2	1	Ground floor	O	2014-01-08	56	4.5	0.4	7.2
2	1	Ground floor	O	2014-06-06	46	16.5	9.7	22.3
2	1	Ground floor	O	2015-01-15	46	3.2	-0.3	8.6
2	1	Ground floor	O	2015-08-20	42	16.2	10.7	20.6
2	1	First floor	A	2011-07-19	180	20.2	15.6	28.9
2	1	First floor	A	2011-08-20	231	25.2	14.9	27.8
2	1	First floor	A	2011-09-01	114	15	9.2	21.7
2	1	First floor	A	2012-07-20	211	25.4	16.6	28.3
2	1	First floor	A	2013-01-29	11	2	-2.1	9.8
2	1	First floor	A	2014-01-08	124	4.5	0.4	7.2
2	1	First floor	A	2014-06-06	112	16.5	9.7	22.3
2	1	First floor	A	2015-01-15	180	3.2	-0.3	8.6
2	1	First floor	A	2015-08-20	86	16.2	10.7	20.6
2	1	First floor	B	2011-07-19	242	20.2	15.6	28.9
2	1	First floor	B	2011-08-20	186	25.2	14.9	27.8
2	1	First floor	B	2011-09-01	159	15	9.2	21.7
2	1	First floor	B	2012-07-20	212	25.4	16.6	28.3
2	1	First floor	B	2013-01-29	20	2	-2.1	9.8
2	1	First floor	B	2014-01-08	22	4.5	0.4	7.2
2	1	First floor	B	2014-06-06	118	16.5	9.7	22.3
2	1	First floor	B	2015-01-15	242	3.2	-0.3	8.6
2	1	First floor	B	2015-08-20	144	16.2	10.7	20.6
2	1	First floor	C	2011-07-19	205	20.2	15.6	28.9
2	1	First floor	C	2011-08-20	300	25.2	14.9	27.8
2	1	First floor	C	2011-09-01	206	15	9.2	21.7
2	1	First floor	C	2012-07-20	206	25.4	16.6	28.3
2	1	First floor	C	2013-01-29	8	2	-2.1	9.8
2	1	First floor	C	2014-01-08	47	4.5	0.4	7.2
2	1	First floor	C	2014-06-06	133	16.5	9.7	22.3
2	1	First floor	C	2015-01-15	205	3.2	-0.3	8.6
2	1	First floor	C	2015-08-20	134	16.2	10.7	20.6
2	1	First floor	D	2011-07-19	143	20.2	15.6	28.9
2	1	First floor	D	2011-08-20	29	25.2	14.9	27.8
2	1	First floor	D	2011-09-01	155	15	9.2	21.7
2	1	First floor	D	2012-07-20	180	25.4	16.6	28.3
2	1	First floor	D	2013-01-29	5	2	-2.1	9.8
2	1	First floor	D	2014-01-08	24	4.5	0.4	7.2
2	1	First floor	D	2014-06-06	122	16.5	9.7	22.3
2	1	First floor	D	2015-01-15	143	3.2	-0.3	8.6
2	1	First floor	D	2015-08-20	138	16.2	10.7	20.6
2	1	First floor	E	2011-07-19	48	20.2	15.6	28.9
2	1	First floor	E	2011-08-20	167	25.2	14.9	27.8
2	1	First floor	E	2011-09-01	114	15	9.2	21.7
2	1	First floor	E	2012-07-20	167	25.4	16.6	28.3
2	1	First floor	E	2013-01-29	20	2	-2.1	9.8
2	1	First floor	E	2014-01-08	21	4.5	0.4	7.2
2	1	First floor	E	2014-06-06	92	16.5	9.7	22.3
2	1	First floor	E	2015-01-15	48	3.2	-0.3	8.6
2	1	First floor	E	2015-08-20	93	16.2	10.7	20.6
2	1	First floor	F	2011-07-19	172	20.2	15.6	28.9
2	1	First floor	F	2011-08-20	237	25.2	14.9	27.8
2	1	First floor	F	2011-09-01	185	15	9.2	21.7
2	1	First floor	F	2012-07-20	220	25.4	16.6	28.3
2	1	First floor	F	2013-01-29	5	2	-2.1	9.8
2	1	First floor	F	2014-01-08	23	4.5	0.4	7.2
2	1	First floor	F	2014-06-06	127	16.5	9.7	22.3
2	1	First floor	F	2015-01-15	172	3.2	-0.3	8.6
2	1	First floor	F	2015-08-20	121	16.2	10.7	20.6
2	1	First floor	G	2011-07-19	162	20.2	15.6	28.9
2	1	First floor	G	2011-08-20	217	25.2	14.9	27.8
2	1	First floor	G	2011-09-01	200	15	9.2	21.7
2	1	First floor	G	2012-07-20	205	25.4	16.6	28.3
2	1	First floor	G	2013-01-29	5	2	-2.1	9.8
2	1	First floor	G	2014-01-08	24	4.5	0.4	7.2
2	1	First floor	G	2014-06-06	105	16.5	9.7	22.3
2	1	First floor	G	2015-01-15	162	3.2	-0.3	8.6
2	1	First floor	G	2015-08-20	102	16.2	10.7	20.6
2	1	First floor	H	2011-07-19	190	20.2	15.6	28.9
2	1	First floor	H	2011-08-20	225	25.2	14.9	27.8
2	1	First floor	H	2011-09-01	205	15	9.2	21.7
2	1	First floor	H	2012-07-20	205	25.4	16.6	28.3
2	1	First floor	H	2013-01-29	5	2	-2.1	9.8
2	1	First floor	H	2014-01-08	27	4.5	0.4	7.2
2	1	First floor	H	2014-06-06	96	16.5	9.7	22.3
2	1	First floor	H	2015-01-15	190	3.2	-0.3	8.6
2	1	First floor	H	2015-08-20	105	16.2	10.7	20.6
2	2	Ground floor	A	2011-07-19	35	20.2	15.6	28.9
2	2	Ground floor	A	2011-08-20	44	25.2	14.9	27.8
2	2	Ground floor	A	2014-01-08	19	15	9.2	21.7
2	2	Ground floor	A	2015-08-20	67	25.4	16.6	28.3
2	2	Ground floor	B	2011-07-19	45	20.2	15.6	28.9
2	2	Ground floor	B	2011-08-20	50	25.2	14.9	27.8
2	2	Ground floor	B	2014-01-08	40	15	9.2	21.7
2	2	Ground floor	B	2015-08-20	42	25.4	16.6	28.3
2	3	Ground floor	A	2011-07-19	740	20.2	15.6	28.9
2	3	Ground floor	A	2011-08-20	932	25.2	14.9	27.8
2	3	Ground floor	A	2011-09-01	1686	15	9.2	21.7
2	3	Ground floor	A	2012-07-20	601	25.4	16.6	28.3
2	3	Ground floor	A	2013-01-29	120	2	-2.1	9.8
2	3	Ground floor	A	2014-01-08	116	4.5	0.4	7.2
2	3	Ground floor	A	2014-06-06	465	16.5	9.7	22.3
2	3	Ground floor	A	2015-01-15	740	3.2	-0.3	8.6
2	3	Ground floor	A	2015-08-20	969	16.2	10.7	20.6
2	3	Ground floor	B	2011-07-19	122	20.2	15.6	28.9
2	3	Ground floor	B	2011-08-20	177	25.2	14.9	27.8
2	3	Ground floor	B	2011-09-01	139	15	9.2	21.7
2	3	Ground floor	B	2012-07-20	186	25.4	16.6	28.3
2	3	Ground floor	B	2013-01-29	20	2	-2.1	9.8
2	3	Ground floor	B	2014-01-08	27	4.5	0.4	7.2
2	3	Ground floor	B	2014-06-06	197	16.5	9.7	22.3
2	3	Ground floor	B	2015-01-15	122	3.2	-0.3	8.6
2	3	Ground floor	B	2015-08-20	216	16.2	10.7	20.6
2	3	Ground floor	C	2011-07-19	25	20.2	15.6	28.9
2	3	Ground floor	C	2011-08-20	108	25.2	14.9	27.8
2	3	Ground floor	C	2011-09-01	27	15	9.2	21.7
2	3	Ground floor	C	2012-07-20	21	25.4	16.6	28.3
2	3	Ground floor	C	2013-01-29	63	2	-2.1	9.8
2	3	Ground floor	C	2014-01-08	26	4.5	0.4	7.2
2	3	Ground floor	C	2014-06-06	4	16.5	9.7	22.3
2	3	Ground floor	C	2015-01-15	25	3.2	-0.3	8.6
2	3	Ground floor	C	2015-08-20	80	16.2	10.7	20.6
2	3	Ground floor	D	2011-07-19	29	20.2	15.6	28.9
2	3	Ground floor	D	2011-08-20	93	25.2	14.9	27.8
2	3	Ground floor	D	2011-09-01	32	15	9.2	21.7
2	3	Ground floor	D	2012-07-20	77	25.4	16.6	28.3
2	3	Ground floor	D	2013-01-29	6	2	-2.1	9.8
2	3	Ground floor	D	2014-01-08	21	4.5	0.4	7.2
2	3	Ground floor	D	2014-06-06	50	16.5	9.7	22.3
2	3	Ground floor	D	2015-01-15	29	3.2	-0.3	8.6
2	3	Ground floor	D	2015-08-20	65	16.2	10.7	20.6
2	3	Ground floor	E	2011-07-19	59	20.2	15.6	28.9
2	3	Ground floor	E	2011-08-20	95	25.2	14.9	27.8
2	3	Ground floor	E	2011-09-01	51	15	9.2	21.7
2	3	Ground floor	E	2012-07-20	63	25.4	16.6	28.3
2	3	Ground floor	E	2013-01-29	7	2	-2.1	9.8
2	3	Ground floor	E	2014-01-08	24	4.5	0.4	7.2
2	3	Ground floor	E	2014-06-06	81	16.5	9.7	22.3
2	3	Ground floor	E	2015-01-15	58	3.2	-0.3	8.6
2	3	Ground floor	E	2015-08-20	74	16.2	10.7	20.6
2	3	Ground floor	F	2011-07-19	59	20.2	15.6	28.9
2	3	Ground floor	F	2011-08-20	125	25.2	14.9	27.8
2	3	Ground floor	F	2011-09-01	73	15	9.2	21.7
2	3	Ground floor	F	2012-07-20	76	25.4	16.6	28.3
2	3	Ground floor	F	2013-01-29	5	2	-2.1	9.8
2	3	Ground floor	F	2014-01-08	43	4.5	0.4	7.2
2	3	Ground floor	F	2014-06-06	51	16.5	9.7	22.3
2	3	Ground floor	F	2015-01-15	59	3.2	-0.3	8.6
2	3	Ground floor	F	2015-08-20	76	16.2	10.7	20.6
2	3	Ground floor	G	2011-07-19	n.d.	20.2	15.6	28.9
2	3	Ground floor	G	2011-08-20	n.d.	25.2	14.9	27.8
2	3	Ground floor	G	2011-09-01	n.d.	15	9.2	21.7
2	3	Ground floor	G	2012-07-20	32	25.4	16.6	28.3
2	3	Ground floor	G	2013-01-29	55	2	-2.1	9.8
2	3	Ground floor	G	2014-01-08	21	4.5	0.4	7.2
2	3	Ground floor	G	2014-06-06	27	16.5	9.7	22.3
2	3	Ground floor	G	2015-01-15	33	3.2	-0.3	8.6
2	3	Ground floor	G	2015-08-20	101	16.2	10.7	20.6
2	3	First floor	A	2011-07-19	104	20.2	15.6	28.9
2	3	First floor	A	2011-08-20	71	25.2	14.9	27.8
2	3	First floor	A	2011-09-01	n.d.	15	9.2	21.7
2	3	First floor	A	2012-07-20	147	25.4	16.6	28.3
2	3	First floor	A	2013-01-29	n.d.	2	-2.1	9.8
2	3	First floor	A	2014-01-08	13	4.5	0.4	7.2
2	3	First floor	A	2014-06-06	54	16.5	9.7	22.3
2	3	First floor	A	2015-01-15	104	3.2	-0.3	8.6
2	3	First floor	A	2015-08-20	56	16.2	10.7	20.6
2	3	First floor	B	2011-07-19	104	20.2	15.6	28.9
2	3	First floor	B	2011-08-20	70	25.2	14.9	27.8
2	3	First floor	B	2011-09-01	99	15	9.2	21.7
2	3	First floor	B	2012-07-20	40	25.4	16.6	28.3
2	3	First floor	B	2013-01-29	142	2	-2.1	9.8
2	3	First floor	B	2014-01-08	19	4.5	0.4	7.2
2	3	First floor	B	2014-06-06	56	16.5	9.7	22.3
2	3	First floor	B	2015-01-15	110	3.2	-0.3	8.6
2	3	First floor	B	2015-08-20	68	16.2	10.7	20.6
2	3	First floor	C	2011-07-19	92	20.2	15.6	28.9
2	3	First floor	C	2011-08-20	125	25.2	14.9	27.8
2	3	First floor	C	2011-09-01	121	15	9.2	21.7
2	3	First floor	C	2012-07-20	124	25.4	16.6	28.3
2	3	First floor	C	2013-01-29	n.d.	2	-2.1	9.8
2	3	First floor	C	2014-01-08	15	4.5	0.4	7.2
2	3	First floor	C	2014-06-06	n.d.	16.5	9.7	22.3
2	3	First floor	C	2015-01-15	92	3.2	-0.3	8.6
2	3	First floor	C	2015-08-20	49	16.2	10.7	20.6
2	3	First floor	D	2011-07-19	81	20.2	15.6	28.9
2	3	First floor	D	2011-08-20	37	25.2	14.9	27.8
2	3	First floor	D	2011-09-01	30	15	9.2	21.7
2	3	First floor	D	2012-07-20	113	25.4	16.6	28.3
2	3	First floor	D	2013-01-29	13	2	-2.1	9.8
2	3	First floor	D	2014-01-08	13	4.5	0.4	7.2
2	3	First floor	D	2014-06-06	64	16.5	9.7	22.3
2	3	First floor	D	2015-01-15	81	3.2	-0.3	8.6
2	3	First floor	D	2015-08-20	57	16.2	10.7	20.6
2	3	First floor	E	2011-07-19	110	20.2	15.6	28.9
2	3	First floor	E	2011-08-20	97	25.2	14.9	27.8
2	3	First floor	E	2011-09-01	149	15	9.2	21.7
2	3	First floor	E	2012-07-20	65	25.4	16.6	28.3
2	3	First floor	E	2013-01-29	71	2	-2.1	9.8
2	3	First floor	E	2014-01-08	17	4.5	0.4	7.2
2	3	First floor	E	2014-06-06	64	16.5	9.7	22.3
2	3	First floor	E	2015-01-15	81	3.2	-0.3	8.6
2	3	First floor	E	2015-08-20	56	16.2	10.7	20.6
2	3	First floor	F	2011-07-19	89	20.2	15.6	28.9
2	3	First floor	F	2011-08-20	151	25.2	14.9	27.8
2	3	First floor	F	2011-09-01	77	15	9.2	21.7
2	3	First floor	F	2012-07-20	65	25.4	16.6	28.3
2	3	First floor	F	2013-01-29	27	2	-2.1	9.8
2	3	First floor	F	2014-01-08	22	4.5	0.4	7.2
2	3	First floor	F	2014-06-06	61	16.5	9.7	22.3
2	3	First floor	F	2015-01-15	55	3.2	-0.3	8.6
2	3	First floor	F	2015-08-20	48	16.2	10.7	20.6
2	3	First floor	G	2011-07-19	95	20.2	15.6	28.9
2	3	First floor	G	2011-08-20	144	25.2	14.9	27.8
2	3	First floor	G	2011-09-01	51	15	9.2	21.7
2	3	First floor	G	2012-07-20	65	25.4	16.6	28.3
2	3	First floor	G	2013-01-29	24	2	-2.1	9.8
2	3	First floor	G	2014-01-08	19	4.5	0.4	7.2
2	3	First floor	G	2014-06-06	56	16.5	9.7	22.3
2	3	First floor	G	2015-01-15	95	3.2	-0.3	8.6
2	3	First floor	G	2015-08-20	47	16.2	10.7	20.6
2	3	First floor	H	2011-07-19	n.d.	20.2	15.6	28.9
2	3	First floor	H	2011-08-20	n.d.	25.2	14.9	27.8
2	3	First floor	H	2011-09-01	18	15	9.2	21.7
2	3	First floor	H	2012-07-20	63	25.4	16.6	28.3
2	3	First floor	H	2013-01-29	17	2	-2.1	9.8
2	3	First floor	H	2014-01-08	32	4.5	0.4	7.2
2	3	First floor	H	2014-06-06	51	16.5	9.7	22.3
2	3	First floor	H	2015-01-15	77	3.2	-0.3	8.6
2	3	First floor	H	2015-08-20	47	16.2	10.7	20.6
2	3	Mezzanine	I	2011-07-19	81	20.2	15.6	28.9
2	3	Mezzanine	I	2011-08-20	n.d.	25.2	14.9	27.8
2	3	Mezzanine	I	2011-09-01	113	15	9.2	21.7
2	3	Mezzanine	I	2012-07-20	n.d.	25.4	16.6	28.3
2	3	Mezzanine	I	2013-01-29	13	2	-2.1	9.8
2	3	Mezzanine	I	2014-01-08	n.d.	4.5	0.4	7.2
2	3	Mezzanine	I	2014-06-06	50	16.5	9.7	22.3
2	3	Mezzanine	I	2015-01-15	55	3.2	-0.3	8.6
2	3	Mezzanine	I	2015-08-20	49	16.2	10.7	20.6
2	4	Ground floor	A	2011-07-19	83	20.2	15.6	28.9
2	4	Ground floor	A	2011-08-20	n.d.	25.2	14.9	27.8
2	4	Ground floor	A	2011-09-01	n.d.	15	9.2	21.7
2	4	Ground floor	A	2012-07-20	n.d.	25.4	16.6	28.3
2	4	Ground floor	A	2013-01-29	83	2	-2.1	9.8
2	4	Ground floor	A	2014-01-08	n.d.	4.5	0.4	7.2
2	4	Ground floor	A	2014-06-06	n.d.	16.5	9.7	22.3
2	4	Ground floor	A	2015-01-15	n.d.	3.2	-0.3	8.6
2	4	Ground floor	A	2015-08-20	n.d.	16.2	10.7	20.6
2	4	Ground floor	B	2011-07-19	44	20.2	15.6	28.9
2	4	Ground floor	B	2011-08-20	109	25.2	14.9	27.8
2	4	Ground floor	B	2011-09-01	n.d.	15	9.2	21.7
2	4	Ground floor	B	2012-07-20	n.d.	25.4	16.6	28.3
2	4	Ground floor	B	2013-01-29	n.d.	2	-2.1	9.8
2	4	Ground floor	B	2014-01-08	44	4.5	0.4	7.2
2	4	Ground floor	B	2014-06-06	n.d.	16.5	9.7	22.3
2	4	Ground floor	B	2015-01-15	n.d.	3.2	-0.3	8.6
2	4	Ground floor	B	2015-08-20	n.d.	16.2	10.7	20.6
2	4	Ground floor	C	2011-07-19	25	20.2	15.6	28.9
2	4	Ground floor	C	2011-08-20	91	25.2	14.9	27.8
2	4	Ground floor	C	2011-09-01	n.d.	15	9.2	21.7
2	4	Ground floor	C	2012-07-20	n.d.	25.4	16.6	28.3
2	4	Ground floor	C	2013-01-29	n.d.	2	-2.1	9.8
2	4	Ground floor	C	2014-01-08	25	4.5	0.4	7.2
2	4	Ground floor	C	2014-06-06	n.d.	16.5	9.7	22.3
2	4	Ground floor	C	2015-01-15	n.d.	3.2	-0.3	8.6
2	4	Ground floor	C	2015-08-20	n.d.	16.2	10.7	20.6
2	4	Ground floor	D	2011-07-19	82	20.2	15.6	28.9
2	4	Ground floor	D	2011-08-20	76	25.2	14.9	27.8
2	4	Ground floor	D	2011-09-01	n.d.	15	9.2	21.7
2	4	Ground floor	D	2012-07-20	n.d.	25.4	16.6	28.3
2	4	Ground floor	D	2013-01-29	n.d.	2	-2.1	9.8
2	4	Ground floor	D	2014-01-08	82	4.5	0.4	7.2
2	4	Ground floor	D	2014-06-06	n.d.	16.5	9.7	22.3
2	4	Ground floor	D	2015-01-15	n.d.	3.2	-0.3	8.6
2	4	Ground floor	D	2015-08-20	n.d.	16.2	10.7	20.6
2	4	Ground floor	E	2011-07-19	15	20.2	15.6	28.9
2	4	Ground floor	E	2011-08-20	n.d.	25.2	14.9	27.8
2	4	Ground floor	E	2011-09-01	n.d.	15	9.2	21.7
2	4	Ground floor	E	2012-07-20	n.d.	25.4	16.6	28.3
2	4	Ground floor	E	2013-01-29	n.d.	2	-2.1	9.8
2	4	Ground floor	E	2014-01-08	50	4.5	0.4	7.2
2	4	Ground floor	E	2014-06-06	n.d.	16.5	9.7	22.3
2	4	Ground floor	E	2015-01-15	n.d.	3.2	-0.3	8.6
2	4	Ground floor	E	2015-08-20	n.d.	16.2	10.7	20.6
2	4	Ground floor	F	2011-07-19	46	20.2	15.6	28.9
2	4	Ground floor	F	2011-08-20	111	25.2	14.9	27.8
2	4	Ground floor	F	2011-09-01	n.d.	15	9.2	21.7
2	4	Ground floor	F	2012-07-20	n.d.	25.4	16.6	28.3
2	4	Ground floor	F	2013-01-29	n.d.	2	-2.1	9.8
2	4	Ground floor	F	2014-01-08	46	4.5	0.4	7.2
2	4	Ground floor	F	2014-06-06	n.d.	16.5	9.7	22.3
2	4	Ground floor	F	2015-01-15	n.d.	3.2	-0.3	8.6
2	4	Ground floor	F	2015-08-20	n.d.	16.2	10.7	20.6
2	4	First floor	G	2011-07-19	71	20.2	15.6	28.9
2	4	First floor	G	2011-08-20	n.d.	25.2	14.9	27.8
2	4	First floor	G	2011-09-01	n.d.	15	9.2	21.7
2	4	First floor	G	2012-07-20	n.d.	25.4	16.6	28.3
2	4	First floor	G	2013-01-29	n.d.	2	-2.1	9.8
2	4	First floor	G	2014-01-08	70	4.5	0.4	7.2
2	4	First floor	G	2014-06-06	n.d.	16.5	9.7	22.3
2	4	First floor	G	2015-01-15	n.d.	3.2	-0.3	8.6
2	4	First floor	G	2015-08-20	n.d.	16.2	10.7	20.6
2	5	Ground floor	A	2011-07-19	n.d.	20.2	15.6	28.9
2	5	Ground floor	A	2011-08-20	n.d.	25.2	14.9	27.8
2	5	Ground floor	A	2011-09-01	n.d.	15	9.2	21.7
2	5	Ground floor	A	2012-07-20	n.d.	25.4	16.6	28.3
2	5	Ground floor	A	2013-01-29	n.d.	2	-2.1	9.8
2	5	Ground floor	A	2014-01-08	81	4.5	0.4	7.2
2	5	Ground floor	A	2014-06-06	40	16.5	9.7	22.3
2	5	Ground floor	A	2015-01-15	280	3.2	-0.3	8.6
2	5	Ground floor	A	2015-08-20	43	16.2	10.7	20.6
2	5	First Ground floor	B	2011-07-19	1100	20.2	15.6	28.9
2	5	First Ground floor	B	2011-08-20	280	25.2	14.9	27.8
2	5	First Ground floor	B	2011-09-01	85	15	9.2	21.7
2	5	First Ground floor	B	2012-07-20	436	25.4	16.6	28.3
2	5	First Ground floor	B	2013-01-29	22	2	-2.1	9.8
2	5	First Ground floor	B	2014-01-08	11	4.5	0.4	7.2
2	5	First Ground floor	B	2014-06-06	61	16.5	9.7	22.3
2	5	First Ground floor	B	2015-01-15	280	3.2	-0.3	8.6
2	5	First Ground floor	B	2015-08-20	60	16.2	10.7	20.6
2	5	Second Ground floor	C	2011-07-19	1250	20.2	15.6	28.9
2	5	Second Ground floor	C	2011-08-20	256	25.2	14.9	27.8
2	5	Second Ground floor	C	2011-09-01	250	15	9.2	21.7
2	5	Second Ground floor	C	2012-07-20	629	25.4	16.6	28.3
2	5	Second Ground floor	C	2013-01-29	18	2	-2.1	9.8
2	5	Second Ground floor	C	2014-01-08	11	4.5	0.4	7.2
2	5	Second Ground floor	C	2014-06-06	49	16.5	9.7	22.3
2	5	Second Ground floor	C	2015-01-15	256	3.2	-0.3	8.6
2	5	Second Ground floor	C	2015-08-20	89	16.2	10.7	20.6
2	5	Third Ground floor	D	2011-07-19	13600	20.2	15.6	28.9
2	5	Third Ground floor	D	2011-08-20	270	25.2	14.9	27.8
2	5	Third Ground floor	D	2011-09-01	386	15	9.2	21.7
2	5	Third Ground floor	D	2012-07-20	618	25.4	16.6	28.3
2	5	Third Ground floor	D	2013-01-29	7	2	-2.1	9.8
2	5	Third Ground floor	D	2014-01-08	17	4.5	0.4	7.2
2	5	Third Ground floor	D	2014-06-06	99	16.5	9.7	22.3
2	5	Third Ground floor	D	2015-01-15	270	3.2	-0.3	8.6
2	5	Third Ground floor	D	2015-08-20	245	16.2	10.7	20.6
2	6	Ground floor	A	2011-07-19	81	20.2	15.6	28.9
2	6	Ground floor	A	2011-08-20	n.d.	25.2	14.9	27.8
2	6	Ground floor	A	2011-09-01	n.d.	15	9.2	21.7
2	6	Ground floor	A	2012-07-20	n.d.	25.4	16.6	28.3
2	6	Ground floor	A	2013-01-29	n.d.	2	-2.1	9.8
2	6	Ground floor	A	2014-01-08	n.d.	4.5	0.4	7.2
2	6	Ground floor	A	2014-06-06	40	16.5	9.7	22.3
2	6	Ground floor	A	2015-01-15	280	3.2	-0.3	8.6
2	6	Ground floor	A	2015-08-20	43	16.2	10.7	20.6
2	6	Ground floor	B	2011-07-19	58	20.2	15.6	28.9
2	6	Ground floor	B	2011-08-20	26	25.2	14.9	27.8
2	6	Ground floor	B	2011-09-01	n.d.	15	9.2	21.7
2	6	Ground floor	B	2012-07-20	267	25.4	16.6	28.3
2	6	Ground floor	B	2013-01-29	36	2	-2.1	9.8
2	6	Ground floor	B	2014-01-08	19	4.5	0.4	7.2
2	6	Ground floor	B	2014-06-06	49	16.5	9.7	22.3
2	6	Ground floor	B	2015-01-15	68	3.2	-0.3	8.6
2	6	Ground floor	B	2015-08-20	48	16.2	10.7	20.6
2	10	Ground floor	A	2011-07-19	85	20.2	15.6	28.9
2	10	Ground floor	A	2011-08-20	55	25.2	14.9	27.8
2	10	Ground floor	A	2011-09-01	n.d.	15	9.2	21.7
2	10	Ground floor	A	2012-07-20	n.d.	25.4	16.6	28.3
2	10	Ground floor	A	2013-01-29	n.d.	2	-2.1	9.8
2	10	Ground floor	A	2014-01-08	n.d.	4.5	0.4	7.2
2	10	Ground floor	A	2014-06-06	n.d.	16.5	9.7	22.3
2	10	Ground floor	A	2015-01-15	85	3.2	-0.3	8.6
2	10	Ground floor	A	2015-08-20	n.d.	16.2	10.7	20.6
2	10	Ground floor	B	2011-07-19	57	20.2	15.6	28.9
2	10	Ground floor	B	2011-08-20	33	25.2	14.9	27.8
2	10	Ground floor	B	2011-09-01	n.d.	15	9.2	21.7
2	10	Ground floor	B	2012-07-20	80	25.4	16.6	28.3
2	10	Ground floor	B	2013-01-29	5	2	-2.1	9.8
2	10	Ground floor	B	2014-01-08	14	4.5	0.4	7.2
2	10	Ground floor	B	2014-06-06	57	16.5	9.7	22.3
2	10	Ground floor	B	2015-01-15	57	3.2	-0.3	8.6
2	10	Ground floor	B	2015-08-20	55	16.2	10.7	20.6
2	11	Ground floor	C	2011-07-19	55	20.2	15.6	28.9
2	11	Ground floor	C	2011-08-20	29	25.2	14.9	27.8
2	11	Ground floor	C	2011-09-01	n.d.	15	9.2	21.7
2	11	Ground floor	C	2012-07-20	96	25.4	16.6	28.3
2	11	Ground floor	C	2013-01-29	8	2	-2.1	9.8
2	11	Ground floor	C	2014-01-08	22	4.5	0.4	7.2
2	11	Ground floor	C	2014-06-06	56	16.5	9.7	22.3
2	11	Ground floor	C	2015-01-15	55	3.2	-0.3	8.6
2	11	Ground floor	C	2015-08-20	60	16.2	10.7	20.6
2	10; 11	Ground floor	D	2011-07-19	n.d.	20.2	15.6	28.9
2	10; 11	Ground floor	D	2011-08-20	n.d.	25.2	14.9	27.8
2	10; 11	Ground floor	D	2011-09-01	n.d.	15	9.2	21.7
2	10; 11	Ground floor	D	2012-07-20	66	25.4	16.6	28.3
2	10; 11	Ground floor	D	2013-01-29	36	2	-2.1	9.8
2	10; 11	Ground floor	D	2014-01-08	15	4.5	0.4	7.2
2	10; 11	Ground floor	D	2014-06-06	34	16.5	9.7	22.3
2	10; 11	Ground floor	D	2015-01-15	50	3.2	-0.3	8.6
2	10; 11	Ground floor	D	2015-08-20	55	16.2	10.7	20.6
2	25	Ground floor	A	2011-07-19	1680	20.2	15.6	28.9
2	25	Ground floor	A	2011-08-20	n.d.	25.2	14.9	27.8
2	25	Ground floor	A	2011-09-01	n.d.	15	9.2	21.7
2	25	Ground floor	A	2012-07-20	985	25.4	16.6	28.3
2	25	Ground floor	A	2013-01-29	1001	2	-2.1	9.8
2	25	Ground floor	A	2014-01-08	3608	4.5	0.4	7.2
2	25	Ground floor	A	2014-06-06	684	16.5	9.7	22.3
2	25	Ground floor	A	2015-01-15	1680	3.2	-0.3	8.6
2	25	Ground floor	A	2015-08-20	433	16.2	10.7	20.6
2	25	Ground floor	B	2011-07-19	927	20.2	15.6	28.9
2	25	Ground floor	B	2011-08-20	n.d.	25.2	14.9	27.8
2	25	Ground floor	B	2011-09-01	n.d.	15	9.2	21.7
2	25	Ground floor	B	2012-07-20	818	25.4	16.6	28.3
2	25	Ground floor	B	2013-01-29	896	2	-2.1	9.8
2	25	Ground floor	B	2014-01-08	3698	4.5	0.4	7.2
2	25	Ground floor	B	2014-06-06	591	16.5	9.7	22.3
2	25	Ground floor	B	2015-01-15	927	3.2	-0.3	8.6
2	25	Ground floor	B	2015-08-20	419	16.2	10.7	20.6
2	25	Ground floor	C	2011-07-19	922	20.2	15.6	28.9
2	25	Ground floor	C	2011-08-20	n.d.	25.2	14.9	27.8
2	25	Ground floor	C	2011-09-01	n.d.	15	9.2	21.7
2	25	Ground floor	C	2012-07-20	634	25.4	16.6	28.3
2	25	Ground floor	C	2013-01-29	881	2	-2.1	9.8
2	25	Ground floor	C	2014-01-08	2131	4.5	0.4	7.2
2	25	Ground floor	C	2014-06-06	699	16.5	9.7	22.3
2	25	Ground floor	C	2015-01-15	922	3.2	-0.3	8.6
2	25	Ground floor	C	2015-08-20	355	16.2	10.7	20.6
2	25	Ground floor	D	2011-07-19	2022	20.2	15.6	28.9
2	25	Ground floor	D	2011-08-20	n.d.	25.2	14.9	27.8
2	25	Ground floor	D	2011-09-01	n.d.	15	9.2	21.7
2	25	Ground floor	D	2012-07-20	906	25.4	16.6	28.3
2	25	Ground floor	D	2013-01-29	680	2	-2.1	9.8
2	25	Ground floor	D	2014-01-08	2350	4.5	0.4	7.2
2	25	Ground floor	D	2014-06-06	650	16.5	9.7	22.3
2	25	Ground floor	D	2015-01-15	1280	3.2	-0.3	8.6
2	25	Ground floor	D	2015-08-20	735	16.2	10.7	20.6
2	25	Ground floor	E	2011-07-19	1280	20.2	15.6	28.9
2	25	Ground floor	E	2011-08-20	n.d.	25.2	14.9	27.8
2	25	Ground floor	E	2011-09-01	n.d.	15	9.2	21.7
2	25	Ground floor	E	2012-07-20	1032	25.4	16.6	28.3
2	25	Ground floor	E	2013-01-29	999	2	-2.1	9.8
2	25	Ground floor	E	2014-01-08	847	4.5	0.4	7.2
2	25	Ground floor	E	2014-06-06	773	16.5	9.7	22.3
2	25	Ground floor	E	2015-01-15	1351	3.2	-0.3	8.6
2	25	Ground floor	E	2015-08-20	695	16.2	10.7	20.6
2	25	Ground floor	F	2011-07-19	1586	20.2	15.6	28.9
2	25	Ground floor	F	2011-08-20	n.d.	25.2	14.9	27.8
2	25	Ground floor	F	2011-09-01	n.d.	15	9.2	21.7
2	25	Ground floor	F	2012-07-20	695	25.4	16.6	28.3
2	25	Ground floor	F	2013-01-29	1462	2	-2.1	9.8
2	25	Ground floor	F	2014-01-08	2252	4.5	0.4	7.2
2	25	Ground floor	F	2014-06-06	1033	16.5	9.7	22.3
2	25	Ground floor	F	2015-01-15	1586	3.2	-0.3	8.6
2	25	Ground floor	F	2015-08-20	610	16.2	10.7	20.6
2	25	Ground floor	G	2011-07-19	1586	20.2	15.6	28.9
2	25	Ground floor	G	2011-08-20	n.d.	25.2	14.9	27.8
2	25	Ground floor	G	2011-09-01	n.d.	15	9.2	21.7
2	25	Ground floor	G	2012-07-20	1313	25.4	16.6	28.3
2	25	Ground floor	G	2013-01-29	1014	2	-2.1	9.8
2	25	Ground floor	G	2014-01-08	2269	4.5	0.4	7.2
2	25	Ground floor	G	2014-06-06	667	16.5	9.7	22.3
2	25	Ground floor	G	2015-01-15	2022	3.2	-0.3	8.6
2	25	Ground floor	G	2015-08-20	408	16.2	10.7	20.6
2	25	Ground floor	H	2011-07-19	n.d.	20.2	15.6	28.9
2	25	Ground floor	H	2011-08-20	n.d.	25.2	14.9	27.8
2	25	Ground floor	H	2011-09-01	n.d.	15	9.2	21.7
2	25	Ground floor	H	2012-07-20	275	25.4	16.6	28.3
2	25	Ground floor	H	2013-01-29	n.d.	2	-2.1	9.8
2	25	Ground floor	H	2014-01-08	368	4.5	0.4	7.2
2	25	Ground floor	H	2014-06-06	57	16.5	9.7	22.3
2	25	Ground floor	H	2015-01-15	70	3.2	-0.3	8.6
2	25	Ground floor	H	2015-08-20	84	16.2	10.7	20.6
2	25	Ground floor	I	2011-07-19	736	20.2	15.6	28.9
2	25	Ground floor	I	2011-08-20	n.d.	25.2	14.9	27.8
2	25	Ground floor	I	2011-09-01	n.d.	15	9.2	21.7
2	25	Ground floor	I	2012-07-20	n.d.	25.4	16.6	28.3
2	25	Ground floor	I	2013-01-29	n.d.	2	-2.1	9.8
2	25	Ground floor	I	2014-01-08	n.d.	4.5	0.4	7.2
2	25	Ground floor	I	2014-06-06	n.d.	16.5	9.7	22.3
2	25	Ground floor	I	2015-01-15	746	3.2	-0.3	8.6
2	25	Ground floor	I	2015-08-20	n.d.	16.2	10.7	20.6
2	26	Ground floor	A	2011-07-19	n.d.	20.2	15.6	28.9
2	26	Ground floor	A	2011-08-20	n.d.	25.2	14.9	27.8
2	26	Ground floor	A	2011-09-01	n.d.	15	9.2	21.7
2	26	Ground floor	A	2012-07-20	2883	25.4	16.6	28.3
2	26	Ground floor	A	2013-01-29	123	2	-2.1	9.8
2	26	Ground floor	A	2014-01-08	204	4.5	0.4	7.2
2	26	Ground floor	A	2014-06-06	438	16.5	9.7	22.3
2	26	Ground floor	A	2015-01-15	757	3.2	-0.3	8.6
2	26	Ground floor	A	2015-08-20	1502	16.2	10.7	20.6
2	26	Ground floor	B	2011-07-19	n.d.	20.2	15.6	28.9
2	26	Ground floor	B	2011-08-20	n.d.	25.2	14.9	27.8
2	26	Ground floor	B	2011-09-01	n.d.	15	9.2	21.7
2	26	Ground floor	B	2012-07-20	2540	25.4	16.6	28.3
2	26	Ground floor	B	2013-01-29	132	2	-2.1	9.8
2	26	Ground floor	B	2014-01-08	300	4.5	0.4	7.2
2	26	Ground floor	B	2014-06-06	386	16.5	9.7	22.3
2	26	Ground floor	B	2015-01-15	1803	3.2	-0.3	8.6
2	26	Ground floor	B	2015-08-20	657	16.2	10.7	20.6
2	26	Ground floor	C	2011-07-19	n.d.	20.2	15.6	28.9
2	26	Ground floor	C	2011-08-20	n.d.	25.2	14.9	27.8
2	26	Ground floor	C	2011-09-01	n.d.	15	9.2	21.7
2	26	Ground floor	C	2012-07-20	2476	25.4	16.6	28.3
2	26	Ground floor	C	2013-01-29	114	2	-2.1	9.8
2	26	Ground floor	C	2014-01-08	237	4.5	0.4	7.2
2	26	Ground floor	C	2014-06-06	173	16.5	9.7	22.3
2	26	Ground floor	C	2015-01-15	n.d.	3.2	-0.3	8.6
2	26	Ground floor	C	2015-08-20	524	16.2	10.7	20.6
2	26	Ground floor	D	2011-07-19	1803	20.2	15.6	28.9
2	26	Ground floor	D	2011-08-20	1479	25.2	14.9	27.8
2	26	Ground floor	D	2011-09-01	n.d.	15	9.2	21.7
2	26	Ground floor	D	2012-07-20	1815	25.4	16.6	28.3
2	26	Ground floor	D	2013-01-29	855	2	-2.1	9.8
2	26	Ground floor	D	2014-01-08	222	4.5	0.4	7.2
2	26	Ground floor	D	2014-06-06	1961	16.5	9.7	22.3
2	26	Ground floor	D	2015-01-15	1803	3.2	-0.3	8.6
2	26	Ground floor	D	2015-08-20	2431	16.2	10.7	20.6
2	26	Ground floor	E	2011-07-19	2798	20.2	15.6	28.9
2	26	Ground floor	E	2011-08-20	2031	25.2	14.9	27.8
2	26	Ground floor	E	2011-09-01	n.d.	15	9.2	21.7
2	26	Ground floor	E	2012-07-20	2390	25.4	16.6	28.3
2	26	Ground floor	E	2013-01-29	829	2	-2.1	9.8
2	26	Ground floor	E	2014-01-08	1989	4.5	0.4	7.2
2	26	Ground floor	E	2014-06-06	3187	16.5	9.7	22.3
2	26	Ground floor	E	2015-01-15	2798	3.2	-0.3	8.6
2	26	Ground floor	E	2015-08-20	4371	16.2	10.7	20.6
2	26	Ground floor	F	2011-07-19	3032	20.2	15.6	28.9
2	26	Ground floor	F	2011-08-20	4287	25.2	14.9	27.8
2	26	Ground floor	F	2011-09-01	n.d.	15	9.2	21.7
2	26	Ground floor	F	2012-07-20	2939	25.4	16.6	28.3
2	26	Ground floor	F	2013-01-29	1338	2	-2.1	9.8
2	26	Ground floor	F	2014-01-08	2626	4.5	0.4	7.2
2	26	Ground floor	F	2014-06-06	2524	16.5	9.7	22.3
2	26	Ground floor	F	2015-01-15	3032	3.2	-0.3	8.6
2	26	Ground floor	F	2015-08-20	2469	16.2	10.7	20.6
2	26	Ground floor	G	2011-07-19	2290	20.2	15.6	28.9
2	26	Ground floor	G	2011-08-20	3167	25.2	14.9	27.8
2	26	Ground floor	G	2011-09-01	n.d.	15	9.2	21.7
2	26	Ground floor	G	2012-07-20	2560	25.4	16.6	28.3
2	26	Ground floor	G	2013-01-29	984	2	-2.1	9.8
2	26	Ground floor	G	2014-01-08	2495	4.5	0.4	7.2
2	26	Ground floor	G	2014-06-06	2512	16.5	9.7	22.3
2	26	Ground floor	G	2015-01-15	2290	3.2	-0.3	8.6
2	26	Ground floor	G	2015-08-20	4453	16.2	10.7	20.6
2	26	Ground floor	H	2011-07-19	n.d.	20.2	15.6	28.9
2	26	Ground floor	H	2011-08-20	n.d.	25.2	14.9	27.8
2	26	Ground floor	H	2011-09-01	n.d.	15	9.2	21.7
2	26	Ground floor	H	2012-07-20	497	25.4	16.6	28.3
2	26	Ground floor	H	2013-01-29	n.d.	2	-2.1	9.8
2	26	Ground floor	H	2014-01-08	62	4.5	0.4	7.2
2	26	Ground floor	H	2014-06-06	57	16.5	9.7	22.3
2	26	Ground floor	H	2015-01-15	n.d.	3.2	-0.3	8.6
2	26	Ground floor	H	2015-08-20	94	16.2	10.7	20.6
2	26	Ground floor	I	2011-07-19	3465	20.2	15.6	28.9
2	26	Ground floor	I	2011-08-20	2760	25.2	14.9	27.8
2	26	Ground floor	I	2011-09-01	n.d.	15	9.2	21.7
2	26	Ground floor	I	2012-07-20	n.d.	25.4	16.6	28.3
2	26	Ground floor	I	2013-01-29	n.d.	2	-2.1	9.8
2	26	Ground floor	I	2014-01-08	n.d.	4.5	0.4	7.2
2	26	Ground floor	I	2014-06-06	n.d.	16.5	9.7	22.3
2	26	Ground floor	I	2015-01-15	4265	3.2	-0.3	8.6
2	26	Ground floor	I	2015-08-20	3824	16.2	10.7	20.6
2	26	Ground floor	J	2011-07-19	3465	20.2	15.6	28.9
2	26	Ground floor	J	2011-08-20	2760	25.2	14.9	27.8
2	26	Ground floor	J	2011-09-01	n.d.	15	9.2	21.7
2	26	Ground floor	J	2012-07-20	n.d.	25.4	16.6	28.3
2	26	Ground floor	J	2013-01-29	n.d.	2	-2.1	9.8
2	26	Ground floor	J	2014-01-08	n.d.	4.5	0.4	7.2
2	26	Ground floor	J	2014-06-06	n.d.	16.5	9.7	22.3
2	26	Ground floor	J	2015-01-15	3435	3.2	-0.3	8.6
2	26	Ground floor	J	2015-08-20	n.d.	16.2	10.7	20.6
2	30	Ground floor	A	2011-07-19	619	20.2	15.6	28.9
2	30	Ground floor	A	2011-08-20	389	25.2	14.9	27.8
2	30	Ground floor	A	2011-09-01	611	15	9.2	21.7
2	30	Ground floor	A	2012-07-20	950	25.4	16.6	28.3
2	30	Ground floor	A	2013-01-29	58	2	-2.1	9.8
2	30	Ground floor	A	2014-01-08	129	4.5	0.4	7.2
2	30	Ground floor	A	2014-06-06	198	16.5	9.7	22.3
2	30	Ground floor	A	2015-01-15	619	3.2	-0.3	8.6
2	30	Ground floor	A	2015-08-20	601	16.2	10.7	20.6
2	30	First floor	B	2011-07-19	368	20.2	15.6	28.9
2	30	First floor	B	2011-08-20	505	25.2	14.9	27.8
2	30	First floor	B	2011-09-01	273	15	9.2	21.7
2	30	First floor	B	2012-07-20	297	25.4	16.6	28.3
2	30	First floor	B	2013-01-29	50	2	-2.1	9.8
2	30	First floor	B	2014-01-08	92	4.5	0.4	7.2
2	30	First floor	B	2014-06-06	126	16.5	9.7	22.3
2	30	First floor	B	2015-01-15	368	3.2	-0.3	8.6
2	30	First floor	B	2015-08-20	288	16.2	10.7	20.6
2	31	First floor	A	2011-07-19	535	20.2	15.6	28.9
2	31	First floor	A	2011-08-20	589	25.2	14.9	27.8
2	31	First floor	A	2011-09-01	739	15	9.2	21.7
2	31	First floor	A	2012-07-20	928	25.4	16.6	28.3
2	31	First floor	A	2013-01-29	74	2	-2.1	9.8
2	31	First floor	A	2014-01-08	251	4.5	0.4	7.2
2	31	First floor	A	2014-06-06	386	16.5	9.7	22.3
2	31	First floor	A	2015-01-15	535	3.2	-0.3	8.6
2	31	First floor	A	2015-08-20	410	16.2	10.7	20.6
2	31	First floor	B	2011-07-19	685	20.2	15.6	28.9
2	31	First floor	B	2011-08-20	1175	25.2	14.9	27.8
2	31	First floor	B	2011-09-01	825	15	9.2	21.7
2	31	First floor	B	2012-07-20	1059	25.4	16.6	28.3
2	31	First floor	B	2013-01-29	212	2	-2.1	9.8
2	31	First floor	B	2014-01-08	244	4.5	0.4	7.2
2	31	First floor	B	2014-06-06	472	16.5	9.7	22.3
2	31	First floor	B	2015-01-15	685	3.2	-0.3	8.6
2	31	First floor	B	2015-08-20	515	16.2	10.7	20.6
2	31	First floor	C	2011-07-19	545	20.2	15.6	28.9
2	31	First floor	C	2011-08-20	867	25.2	14.9	27.8
2	31	First floor	C	2011-09-01	759	15	9.2	21.7
2	31	First floor	C	2012-07-20	757	25.4	16.6	28.3
2	31	First floor	C	2013-01-29	89	2	-2.1	9.8
2	31	First floor	C	2014-01-08	161	4.5	0.4	7.2
2	31	First floor	C	2014-06-06	388	16.5	9.7	22.3
2	31	First floor	C	2015-01-15	545	3.2	-0.3	8.6
2	31	First floor	C	2015-08-20	238	16.2	10.7	20.6
2	31	First floor	D	2011-07-19	405	20.2	15.6	28.9
2	31	First floor	D	2011-08-20	624	25.2	14.9	27.8
2	31	First floor	D	2011-09-01	727	15	9.2	21.7
2	31	First floor	D	2012-07-20	556	25.4	16.6	28.3
2	31	First floor	D	2013-01-29	80	2	-2.1	9.8
2	31	First floor	D	2014-01-08	1551	4.5	0.4	7.2
2	31	First floor	D	2014-06-06	365	16.5	9.7	22.3
2	31	First floor	D	2015-01-15	405	3.2	-0.3	8.6
2	31	First floor	D	2015-08-20	154	16.2	10.7	20.6
2	32	Ground floor	A	2011-07-19	n.d.	20.2	15.6	28.9
2	32	Ground floor	A	2011-08-20	n.d.	25.2	14.9	27.8
2	32	Ground floor	A	2011-09-01	n.d.	15	9.2	21.7
2	32	Ground floor	A	2012-07-20	300	25.4	16.6	28.3
2	32	Ground floor	A	2013-01-29	98	2	-2.1	9.8
2	32	Ground floor	A	2014-01-08	519	4.5	0.4	7.2
2	32	Ground floor	A	2014-06-06	857	16.5	9.7	22.3
2	32	Ground floor	A	2015-01-15	742	3.2	-0.3	8.6
2	32	Ground floor	A	2015-08-20	526	16.2	10.7	20.6
2	32	Ground floor	B	2011-07-19	1692	20.2	15.6	28.9
2	32	Ground floor	B	2011-08-20	2266	25.2	14.9	27.8
2	32	Ground floor	B	2011-09-01	571	15	9.2	21.7
2	32	Ground floor	B	2012-07-20	2358	25.4	16.6	28.3
2	32	Ground floor	B	2013-01-29	1039	2	-2.1	9.8
2	32	Ground floor	B	2014-01-08	1072	4.5	0.4	7.2
2	32	Ground floor	B	2014-06-06	1112	16.5	9.7	22.3
2	32	Ground floor	B	2015-01-15	1692	3.2	-0.3	8.6
2	32	Ground floor	B	2015-08-20	733	16.2	10.7	20.6
2	32	Ground floor	C	2011-07-19	748	20.2	15.6	28.9
2	32	Ground floor	C	2011-08-20	1457	25.2	14.9	27.8
2	32	Ground floor	C	2011-09-01	1216	15	9.2	21.7
2	32	Ground floor	C	2012-07-20	1450	25.4	16.6	28.3
2	32	Ground floor	C	2013-01-29	543	2	-2.1	9.8
2	32	Ground floor	C	2014-01-08	464	4.5	0.4	7.2
2	32	Ground floor	C	2014-06-06	731	16.5	9.7	22.3
2	32	Ground floor	C	2015-01-15	748	3.2	-0.3	8.6
2	32	Ground floor	C	2015-08-20	622	16.2	10.7	20.6
2	32	Ground floor	D	2011-07-19	826	20.2	15.6	28.9
2	32	Ground floor	D	2011-08-20	1277	25.2	14.9	27.8
2	32	Ground floor	D	2011-09-01	1134	15	9.2	21.7
2	32	Ground floor	D	2012-07-20	1179	25.4	16.6	28.3
2	32	Ground floor	D	2013-01-29	553	2	-2.1	9.8
2	32	Ground floor	D	2014-01-08	590	4.5	0.4	7.2
2	32	Ground floor	D	2014-06-06	693	16.5	9.7	22.3
2	32	Ground floor	D	2015-01-15	826	3.2	-0.3	8.6
2	32	Ground floor	D	2015-08-20	499	16.2	10.7	20.6
2	32	Ground floor	E	2011-07-19	1204	20.2	15.6	28.9
2	32	Ground floor	E	2011-08-20	1286	25.2	14.9	27.8
2	32	Ground floor	E	2011-09-01	1292	15	9.2	21.7
2	32	Ground floor	E	2012-07-20	955	25.4	16.6	28.3
2	32	Ground floor	E	2013-01-29	333	2	-2.1	9.8
2	32	Ground floor	E	2014-01-08	498	4.5	0.4	7.2
2	32	Ground floor	E	2014-06-06	839	16.5	9.7	22.3
2	32	Ground floor	E	2015-01-15	1204	3.2	-0.3	8.6
2	32	Ground floor	E	2015-08-20	641	16.2	10.7	20.6
2	32	Ground floor	F	2011-07-19	1248	20.2	15.6	28.9
2	32	Ground floor	F	2011-08-20	1429	25.2	14.9	27.8
2	32	Ground floor	F	2011-09-01	1328	15	9.2	21.7
2	32	Ground floor	F	2012-07-20	1302	25.4	16.6	28.3
2	32	Ground floor	F	2013-01-29	564	2	-2.1	9.8
2	32	Ground floor	F	2014-01-08	828	4.5	0.4	7.2
2	32	Ground floor	F	2014-06-06	742	16.5	9.7	22.3
2	32	Ground floor	F	2015-01-15	1248	3.2	-0.3	8.6
2	32	Ground floor	F	2015-08-20	598	16.2	10.7	20.6
2	32	Ground floor	G	2011-07-19	898	20.2	15.6	28.9
2	32	Ground floor	G	2011-08-20	1160	25.2	14.9	27.8
2	32	Ground floor	G	2011-09-01	1269	15	9.2	21.7
2	32	Ground floor	G	2012-07-20	574	25.4	16.6	28.3
2	32	Ground floor	G	2013-01-29	470	2	-2.1	9.8
2	32	Ground floor	G	2014-01-08	748	4.5	0.4	7.2
2	32	Ground floor	G	2014-06-06	726	16.5	9.7	22.3
2	32	Ground floor	G	2015-01-15	898	3.2	-0.3	8.6
2	32	Ground floor	G	2015-08-20	598	16.2	10.7	20.6
2	32	Ground floor	H	2011-07-19	1069	20.2	15.6	28.9
2	32	Ground floor	H	2011-08-20	1176	25.2	14.9	27.8
2	32	Ground floor	H	2011-09-01	1288	15	9.2	21.7
2	32	Ground floor	H	2012-07-20	902	25.4	16.6	28.3
2	32	Ground floor	H	2013-01-29	511	2	-2.1	9.8
2	32	Ground floor	H	2014-01-08	770	4.5	0.4	7.2
2	32	Ground floor	H	2014-06-06	867	16.5	9.7	22.3
2	32	Ground floor	H	2015-01-15	1059	3.2	-0.3	8.6
2	32	Ground floor	H	2015-08-20	815	16.2	10.7	20.6
2	32	Ground floor	I	2011-07-19	1903	20.2	15.6	28.9
2	32	Ground floor	I	2011-08-20	1567	25.2	14.9	27.8
2	32	Ground floor	I	2011-09-01	1447	15	9.2	21.7
2	32	Ground floor	I	2012-07-20	1826	25.4	16.6	28.3
2	32	Ground floor	I	2013-01-29	718	2	-2.1	9.8
2	32	Ground floor	I	2014-01-08	1078	4.5	0.4	7.2
2	32	Ground floor	I	2014-06-06	1142	16.5	9.7	22.3
2	32	Ground floor	I	2015-01-15	1903	3.2	-0.3	8.6
2	32	Ground floor	I	2015-08-20	1267	16.2	10.7	20.6
2	32	Ground floor	J	2011-07-19	n.d.	20.2	15.6	28.9
2	32	Ground floor	J	2011-08-20	n.d.	25.2	14.9	27.8
2	32	Ground floor	J	2011-09-01	n.d.	15	9.2	21.7
2	32	Ground floor	J	2012-07-20	257	25.4	16.6	28.3
2	32	Ground floor	J	2013-01-29	126	2	-2.1	9.8
2	32	Ground floor	J	2014-01-08	192	4.5	0.4	7.2
2	32	Ground floor	J	2014-06-06	150	16.5	9.7	22.3
2	32	Ground floor	J	2015-01-15	132	3.2	-0.3	8.6
2	32	Ground floor	J	2015-08-20	100	16.2	10.7	20.6
