# Supplementary material for: Gaseous Elemental Mercury and Total and Leached Mercury in Building Materials from the Former Hg-Mining Area of Abbadia San Salvatore (Central Italy)
Source: Int J Environ Res Public Health. 2017 Apr 15;14(4):425. doi: 10.3390/ijerph14040425 (PMC5409626; doi:10.3390/ijerph14040425)
Supplement: Supplementary file 2 [file ijerph-14-00425-s002.xlsx]

## Sheet: Foglio1
Unit	Track	Date 19.07.2011	Date 20.08.2011	Date 01.09.2011	Date 20.07.2012	Date 29.01.2013	Date 08.01.2014	Date 06.06.2014	Date 15.01.2015	Date 20.08.2015	Date 25.02.2016	Date 04.04.2016	Date 07.07.2016	Date 02.09.2016	Date 22.12.2016
	ID	Hg (ng m-3)	Hg (ng m-3)	Hg (ng m-3)	Hg (ng m-3)	Hg (ng m-3)	Hg (ng m-3)	Hg (ng m-3)	Hg (ng m-3)	Hg (ng m-3)	Hg (ng m-3)	Hg (ng m-3)	Hg (ng m-3)	Hg (ng m-3)	Hg (ng m-3)
6	1	n.d.	n.d.	n.d.	n.d.	n.d.	n.d.	n.d.	n.d.	n.d.	166	877	982	787	312
6	2	n.d.	n.d.	n.d.	n.d.	n.d.	n.d.	n.d.	n.d.	n.d.	49	98	713	121	28
6	2bis	n.d.	n.d.	n.d.	n.d.	n.d.	n.d.	n.d.	n.d.	n.d.	52	106	420	54	22
6	3	n.d.	n.d.	n.d.	n.d.	n.d.	n.d.	n.d.	n.d.	n.d.	33	152	60	31	17
6	4	39	214	n.d.	n.d.	n.d.	n.d.	n.d.	n.d.	n.d.	39	214	88	30	12
6	5	n.d.	n.d.	n.d.	n.d.	n.d.	n.d.	n.d.	n.d.	n.d.	37	138	221	164	14
6	6	n.d.	n.d.	n.d.	n.d.	n.d.	n.d.	n.d.	n.d.	n.d.	130	1036	746	145	729
6	7	n.d.	n.d.	n.d.	n.d.	n.d.	n.d.	n.d.	n.d.	n.d.	105	742	937	275	387
6	8	n.d.	n.d.	n.d.	n.d.	n.d.	n.d.	n.d.	n.d.	n.d.	276	388	804	615	489
6	9	n.d.	n.d.	n.d.	n.d.	n.d.	n.d.	n.d.	n.d.	n.d.	1070	1562	1939	3660	1214
6	10	n.d.	n.d.	n.d.	n.d.	n.d.	n.d.	n.d.	n.d.	n.d.	108	639	1534	279	325
6	10bis	n.d.	n.d.	n.d.	n.d.	n.d.	n.d.	n.d.	n.d.	n.d.	98	533	1133	297	311
6	11	n.d.	n.d.	n.d.	n.d.	n.d.	n.d.	n.d.	n.d.	n.d.	43	515	283	84	309
6	12	n.d.	n.d.	n.d.	n.d.	n.d.	n.d.	n.d.	n.d.	n.d.	544	493	1100	474	283
6	13	n.d.	n.d.	n.d.	n.d.	n.d.	n.d.	n.d.	n.d.	n.d.	277	455	1596	1535	212
6	14	n.d.	n.d.	n.d.	n.d.	n.d.	n.d.	n.d.	n.d.	n.d.	326	678	1483	1630	325
6	15	n.d.	n.d.	n.d.	n.d.	787	5482	131	444	126	73	462	420	279	32
6	16	n.d.	n.d.	n.d.	n.d.	1334	6606	203	887	126	50	522	431	308	47
6	17	n.d.	n.d.	n.d.	n.d.	n.d.	n.d.	1234	1434	1637	161	757	4910	1341	1293
6	18	n.d.	n.d.	n.d.	n.d.	127	n.d.	180	167	347	143	252	722	31	107
6	19	n.d.	n.d.	n.d.	n.d.	193	n.d.	172	778	1360	109	522	888	80	469
6	20	n.d.	n.d.	n.d.	n.d.	n.d.	n.d.	n.d.	n.d.	n.d.	89	343	2822	112	447
6	21	n.d.	n.d.	n.d.	n.d.	n.d.	n.d.	n.d.	n.d.	n.d.	50	217	382	43	360
6	22	n.d.	n.d.	n.d.	n.d.	n.d.	n.d.	n.d.	n.d.	n.d.	131	282	625	198	594
6	23	n.d.	5950	2423	7803	928	1448	804	n.d.	1414	177	296	3914	723	1081
6	24	304	5370	540	3688	1845	1058	1012	n.d.	2240	83	885	2429	1642	843
6	25	204	3380	540	1651	773	566	842	n.d.	1109	104	485	784	577	394
6	26	229	1780	929	431	912	722	348	n.d.	877	133	415	1179	561	508
6	27	517	1400	295	1222	728	823	446	n.d.	1267	111	261	1226	593	471
6	28	1099	1120	679	1568	678	1344	626	n.d.	3140	245	353	1670	707	434
6	29	465	1200	726	1648	1000	1325	561	n.d.	1659	156	588	1767	914	475
6	30	n.d.	65	370	803	n.d.	n.d.	560	1020	n.d.	24	225	420	290	78
6	31	n.d.	580	395	500	n.d.	n.d.	613	n.d.	575	62	146	523	575	155
6	32	n.d.	450	420	10627	n.d.	n.d.	2886	n.d.	1935	124	3280	4728	1477	575
6	33	4187	n.d.	n.d.	10931	n.d.	n.d.	2246	n.d.	4761	429	4077	6091	2960	737
6	34	n.d.	n.d.	n.d.	n.d.	n.d.	n.d.	n.d.	n.d.	n.d.	618	3531	3453	8509	762
6	35	n.d.	n.d.	n.d.	n.d.	n.d.	n.d.	n.d.	n.d.	n.d.	17	528	10096	1137	458
6	35bis	n.d.	n.d.	n.d.	n.d.	n.d.	n.d.	n.d.	n.d.	n.d.	n.d.	138	1258	2480	364
6	36	n.d.	n.d.	n.d.	n.d.	n.d.	n.d.	3953	n.d.	5104	137	57	3192	1796	525
6	37	n.d.	n.d.	n.d.	n.d.	n.d.	n.d.	2788	n.d.	5519	180	234	1332	10835	638
6	38	n.d.	n.d.	n.d.	n.d.	n.d.	n.d.	2108	n.d.	3987	258	133	1009	1569	637
6	39	n.d.	n.d.	n.d.	n.d.	n.d.	n.d.	2996	n.d.	731	136	146	2906	1100	568
6	40	n.d.	n.d.	n.d.	n.d.	n.d.	n.d.	7450	n.d.	948	155	201	1530	1535	374
6	41	n.d.	n.d.	n.d.	n.d.	n.d.	n.d.	n.d.	n.d.	n.d.	210	814	1577	2260	480
6	41bis	n.d.	n.d.	n.d.	n.d.	n.d.	n.d.	n.d.	n.d.	n.d.	226	278	845	749	315
6	41tris	n.d.	n.d.	n.d.	n.d.	n.d.	n.d.	n.d.	n.d.	n.d.	411	199	509	621	479
6	42	3200	n.d.	n.d.	n.d.	5706	n.d.	2430	n.d.	6875	974	5845	18851	11261	1879
6	43	n.d.	n.d.	n.d.	15651	5451	n.d.	12329	n.d.	6673	3569	4715	18581	4600	993
6	44	3636	n.d.	n.d.	n.d.	4533	n.d.	2430	n.d.	11563	271	999	7481	8523	4159
6	45	n.d.	n.d.	n.d.	9521	4256	n.d.	32510	n.d.	11883	762	1954	9924	13603	4158
6	46	n.d.	n.d.	n.d.	n.d.	n.d.	n.d.	n.d.	n.d.	n.d.	2080	4002	5236	7991	3285
6	47	n.d.	n.d.	n.d.	n.d.	n.d.	n.d.	n.d.	n.d.	n.d.	985	4616	6809	8943	3390
6	48	n.d.	n.d.	n.d.	n.d.	n.d.	n.d.	n.d.	n.d.	n.d.	4613	8858	18053	7874	3459
6	49	n.d.	n.d.	n.d.	n.d.	n.d.	n.d.	n.d.	n.d.	n.d.	1930	5745	10624	8575	4252
6	50	>50000	n.d.	n.d.	>50000	n.d.	n.d.	>50000	n.d.	n.d.	2221	8833	14161	15227	6695
6	51	n.d.	n.d.	n.d.	n.d.	n.d.	n.d.	n.d.	n.d.	n.d.	3306	6795	14029	11812	9101
6	52	5090	n.d.	16856	5720	4161	8391	12045	n.d.	10795	1291	4180	16581	3747	4180
6	53	14000	n.d.	27500	10726	10723	18726	7248	n.d.	16593	2178	5112	17989	1286	4829
6	54	n.d.	n.d.	n.d.	n.d.	n.d.	n.d.	n.d.	n.d.	n.d.	1851	4020	20017	2477	3577
6	55	n.d.	n.d.	n.d.	n.d.	n.d.	n.d.	n.d.	n.d.	n.d.	1217	5700	13694	1002	4027
6	56	n.d.	n.d.	n.d.	n.d.	n.d.	n.d.	n.d.	n.d.	n.d.	251	912	4088	2734	1146
6	56bis	1239	n.d.	n.d.	n.d.	2348	n.d.	772	n.d.	121	1211	4794	1643	240	307
6	57	5056	n.d.	n.d.	9831	12953	n.d.	n.d.	n.d.	5666	929	1729	5133	2298	1710
6	58	n.d.	n.d.	n.d.	n.d.	n.d.	n.d.	n.d.	n.d.	n.d.	970	1418	6016	4329	2092
6	59	14000	n.d.	8391	14498	n.d.	n.d.	6654	n.d.	6059	1542	3505	4927	7972	1960
6	60	n.d.	n.d.	n.d.	n.d.	n.d.	n.d.	n.d.	n.d.	n.d.	2138	4683	21123	11713	2953
6	61	n.d.	n.d.	n.d.	n.d.	n.d.	n.d.	n.d.	n.d.	n.d.	2680	8830	10686	8218	3768
6	62	n.d.	n.d.	n.d.	n.d.	n.d.	n.d.	n.d.	n.d.	n.d.	1233	4753	3940	813	990
6	63	n.d.	n.d.	n.d.	n.d.	n.d.	n.d.	n.d.	n.d.	n.d.	576	8634	5229	3531	2469
6	64	n.d.	n.d.	n.d.	n.d.	n.d.	n.d.	n.d.	n.d.	n.d.	375	742	10068	9135	2008
6	65	n.d.	n.d.	n.d.	n.d.	n.d.	n.d.	n.d.	n.d.	n.d.	473	2064	10137	2754	1850
6	66	n.d.	n.d.	n.d.	n.d.	n.d.	n.d.	n.d.	n.d.	n.d.	2768	4963	8774	6107	1774
6	67	n.d.	n.d.	n.d.	n.d.	n.d.	n.d.	n.d.	n.d.	n.d.	380	2083	3903	5561	1448
6	68	n.d.	n.d.	n.d.	n.d.	n.d.	n.d.	n.d.	n.d.	n.d.	2633	3467	6947	2885	1258
6	69	n.d.	n.d.	n.d.	n.d.	n.d.	n.d.	n.d.	n.d.	n.d.	2261	3086	14935	6168	1549
6	70	n.d.	n.d.	n.d.	n.d.	n.d.	n.d.	n.d.	n.d.	n.d.	1701	2763	3870	7781	1570
6	71	n.d.	n.d.	n.d.	n.d.	n.d.	n.d.	n.d.	n.d.	n.d.	310	14299	19124	1780	709
Mean temperature (°C)		20.2	25.2	15	25.4	2	4.5	16.5	3.2	16.2	6.2	14.7	22	20.8	5.6
Min Temperature (°C)		15.6	14.9	9.2	16.6	-2.1	0.4	9.7	-0.3	10.7	3	10.5	15.4	13.7	-0.1
Max Temerature (°C)		28.9	27.8	21.7	28.3	9.8	7.2	22.3	8.6	20.6	8	17.1	27.2	25.7	10.8
